# Supplementary material for: Survival of Migrating Salmon Smolts in Large Rivers With and Without Dams
Source: PLoS Biol. 2008 Oct 28;6(10):e265. doi: 10.1371/journal.pbio.0060265 (PMC2573937; doi:10.1371/journal.pbio.0060265)
Supplement: Text S1 — (108 KB PDF) [file pbio.0060265.sd001.pdf]

## Survival of Migrating Salmon Smolts in Large Rivers With and Without Dams

*PLoS Biology* (2008) 6(10):e265. doi:10.1371/journal.pbio.0060265

### *S.1 Methods for calculating detection efficiency in the lower Fraser River 2006*

We used the Cormack-Jolly-Seber (CJS) recaptures-only model in Program MARK to simultaneously estimate survival and detection probabilities. First, we estimated a variance inflation factor ( $\hat{c}$ ) to compensate for extra-binomial variation in estimated probabilities [i] using MARK's goodness-of-fit bootstrapping routine. We used the general CJS model,  $\phi_{(\text{time}*\text{group})}p_{(\text{time}*\text{group})}$ , where the “time” factor represents re-capture locations at receiver lines and the group factor represents possible combinations of species, stock, and tag type in a given year. Values of  $\hat{c}$  were similar in the Fraser (2004: 3.12; 2005: 1.70; 2006: 1.56) and Columbia (2006: 1.87) rivers.

We modeled detection histories of individual fish at sequential receiver (i.e., “re-capture”) lines within rivers. To reduce the number of estimated parameters, all detections on ocean lines of receivers were lumped together as a single digit representing the final capture history. In the Columbia River, we used a fully time-varying model in survival and detection probabilities for the single population in 2006 (all fish had V9 tags). In the Fraser River, with multiple populations released each year, we used a fully time and group varying model in survival and a time-varying model in detection efficiencies with common tag types aggregated together:  $\phi_{(\text{time}*\text{group})}p_{(\text{time}+\text{tag type})}$ . This model for  $p$  is additive, such that in logit space the difference between detection efficiencies of the two tag types remains constant across all receiver lines. A fully

interacting model allowing for separate differences in detection efficiency between tag types at receiver lines,  $p_{(\text{time} \times \text{tag type})}$ , yielded similar estimates of detection and thus survival probabilities.

We calculated the product of segment-specific survival probabilities within rivers to generate a full-river estimate of survival from release until the last in-river receiver line. We used the Delta method to calculate the variance of this product.

---

<sup>i</sup> K. P. Burnham, D. R. Anderson, G. C. White, C. Brownie, K. H. Pollock. *Design and analysis methods for fish survival experiments based on release-recapture*. (American Fisheries Society Monograph 5, Bethesda, MD, 1987).
