# Supplementary material for: Survival of Migrating Salmon Smolts in Large Rivers With and Without Dams
Source: PLoS Biol. 2008 Oct 28;6(10):e265. doi: 10.1371/journal.pbio.0060265 (PMC2573937; doi:10.1371/journal.pbio.0060265)
Supplement: Text S3 — (101 KB PDF) [file pbio.0060265.sd003.pdf]

## Survival of Migrating Salmon Smolts in Large Rivers With and Without Dams

*PLoS Biology* (2008) 6(10):e265. doi:10.1371/journal.pbio.0060265

### *S.3 Tests of Statistical Significance for Figure 3.*

To calculate the average survival and 95% confidence interval for Fraser R Chinook and steelhead shown in Fig. 3 we used the following Monte Carlo procedure: For the  $j=1, \dots, J$  annual survival estimates available for each species (for example,  $J_{\text{Chinook}}=6$ ;  $J_{\text{Steelhead}}=7$  in the Thompson), we calculated the average of  $J$  survival estimates by drawing from component normalized binomial distributions  $S_j \sim \frac{1}{N_j^*} B(\bar{S}_j, N_j^*)$  that describe the expected probability density function of each survival observation. This was repeated 10,000 times to provide a set of results, each describing the outcome from calculating the average across  $J$  observations, with the individual survival observations weighted by their relative uncertainty.

Here  $S_j \sim \frac{1}{N_j^*} B(\bar{S}_j, N_j^*)$  is the normalized binomial distribution for the  $j^{\text{th}}$  observation of survival with observed survival proportion  $\bar{S}_j$  and sample size  $N_j^*$  (the latter parameter determines the fatness of the tails). The set of  $M=10,000$  survival estimates was used to calculate the average and the interval defining the upper and lower 2.5 percentiles of the distribution. Here  $\bar{S}_j$  is the observed survival for the  $j^{\text{th}}$  group calculated from the CJS model, but we replace the number of fish released,  $N_j$ , by  $N_j^*$ , where  $N_j^*$  is that value of  $N$  that will generate the variance on  $S$  estimated by the CJS model. (We use the fact that the standard error on a proportion  $S_j$  defined by a binomial distribution can be written as

$SE(S_j) = \sqrt{\frac{S_j(1-S_j)}{N}}$ ; knowing  $S_j$  and its standard error, we can solve for the value of  $N_j^*$

that yields this standard error using the binomial distribution, which is  $N_j^* = \frac{S_j(1-S_j)}{SE(S_j)^2}$ .

This is a large sample Gaussian approximation to the binomial appropriate when  $SN \geq 5$ , which is true for all of the annual estimates). This approach was taken because the variance of  $S$  when the detection efficiency of the array is unknown is greater than if the detection efficiency is known. In general, this is a conservative test for our purposes because  $N^* < N$ , and results in sampling from a fatter-tailed distribution. A similar calculation was done to calculate the mean & 95% confidence interval on the average survival estimates reported for the three sections of the Columbia River reported in Fig. 3.

To compare whether survival estimates for Thompson-Fraser fish are different from survival estimates for smolts in the Columbia R, we used a similar procedure, based on calculating the statistical distribution of the difference between pairs of survival estimates for the two rivers. For each of the three Columbia R groups (up-river (impounded), lower-river, or entire river), we calculated a separate set of 10,000 survival estimates formed by averaging over the set of  $j=1, \dots, J$  observations,  $S_j \sim \frac{1}{N_j^*} B(\bar{S}_j, N_j^*)$ , available, and where the  $N_j^*$  values are those needed to yield the reported standard errors on the survival estimates. A separate set of 10,000 survival estimates were drawn using the Fraser R parameters, and the pair-wise set of differences was calculated. If there is no difference in survival between the two rivers, then the difference between these pair-wise

values should be zero on average. We accepted the hypothesis of no difference in survival if the 95% confidence interval on these pair-wise differences included zero. We ran all experiments multiple times to ensure that the conclusions were stable across repeated runs.
